# Supplementary material
Source: publisher site journal article supplement (https://www.dovepress.com/article/545717)
Supplement: Supplementary file 1 [file 545717%20Revised%20Supplementary%20Materials.docx]

**Supplementary**

**Table S1.** Clinicopathological characteristics of patients with diffuse large B-cell lymphoma (DLBCL).

| Variables | Total (n = 89) |
| --- | --- |
|
| Age group, n (%) |  |
| ＜60 | 61 (68.54) |
| ≥60 | 28 (31.46) |
| Gender, n (%) |  |
| Female | 40 (44.94) |
| Male | 49 (55.06) |
| Stage, n (%) |  |
| I | 6 (6.74) |
| II | 32 (35.96) |
| III | 18 (20.22) |
| IV | 33 (37.08) |
| LDH, n (%) |  |
| elevated | 37 (41.57) |
| normal | 52 (58.43) |
| NCCN IPI group, n (%) |  |
| low-risk | 25 (28.09) |
| low-intermediate-risk | 52 (58.43) |
| intermediate-high-risk | 12 (13.48) |
| COO, n (%) |  |
| GCB | 23 (25.84) |
| non-GCB | 66 (74.16) |
| Ki-67 grade, n (%) |  |
| ＜70% | 12 (13.48) |
| ≥70% | 77 (86.52) |
| B symptom, n (%) |  |
| Absent | 78 (87.64) |
| Present | 11 (12.36) |
| ECOG, n (%) |  |
| 0 | 9 (10.11) |
| 1 | 74 (83.15) |
| 2 | 6 (6.74) |
| Extranodal sites, n (%) |  |
| Absent | 75 (84.27) |
| Present | 14 (15.73) |

**NCCN-IPI: National Comprehensive Cancer Network International Prognostic Index; COO: Cell of Origin; GCB: Germinal Center B-cell Type; ECOG: Eastern Cooperative Oncology Group Performance Status.**

**Figure S1.** Graphical representation of the low and high expression of tumor-infiltrating T-lymphocytes (TIL-T) and tumor-associated macrophages (TAMs) in Diffuse large B-cell lymphoma.

| 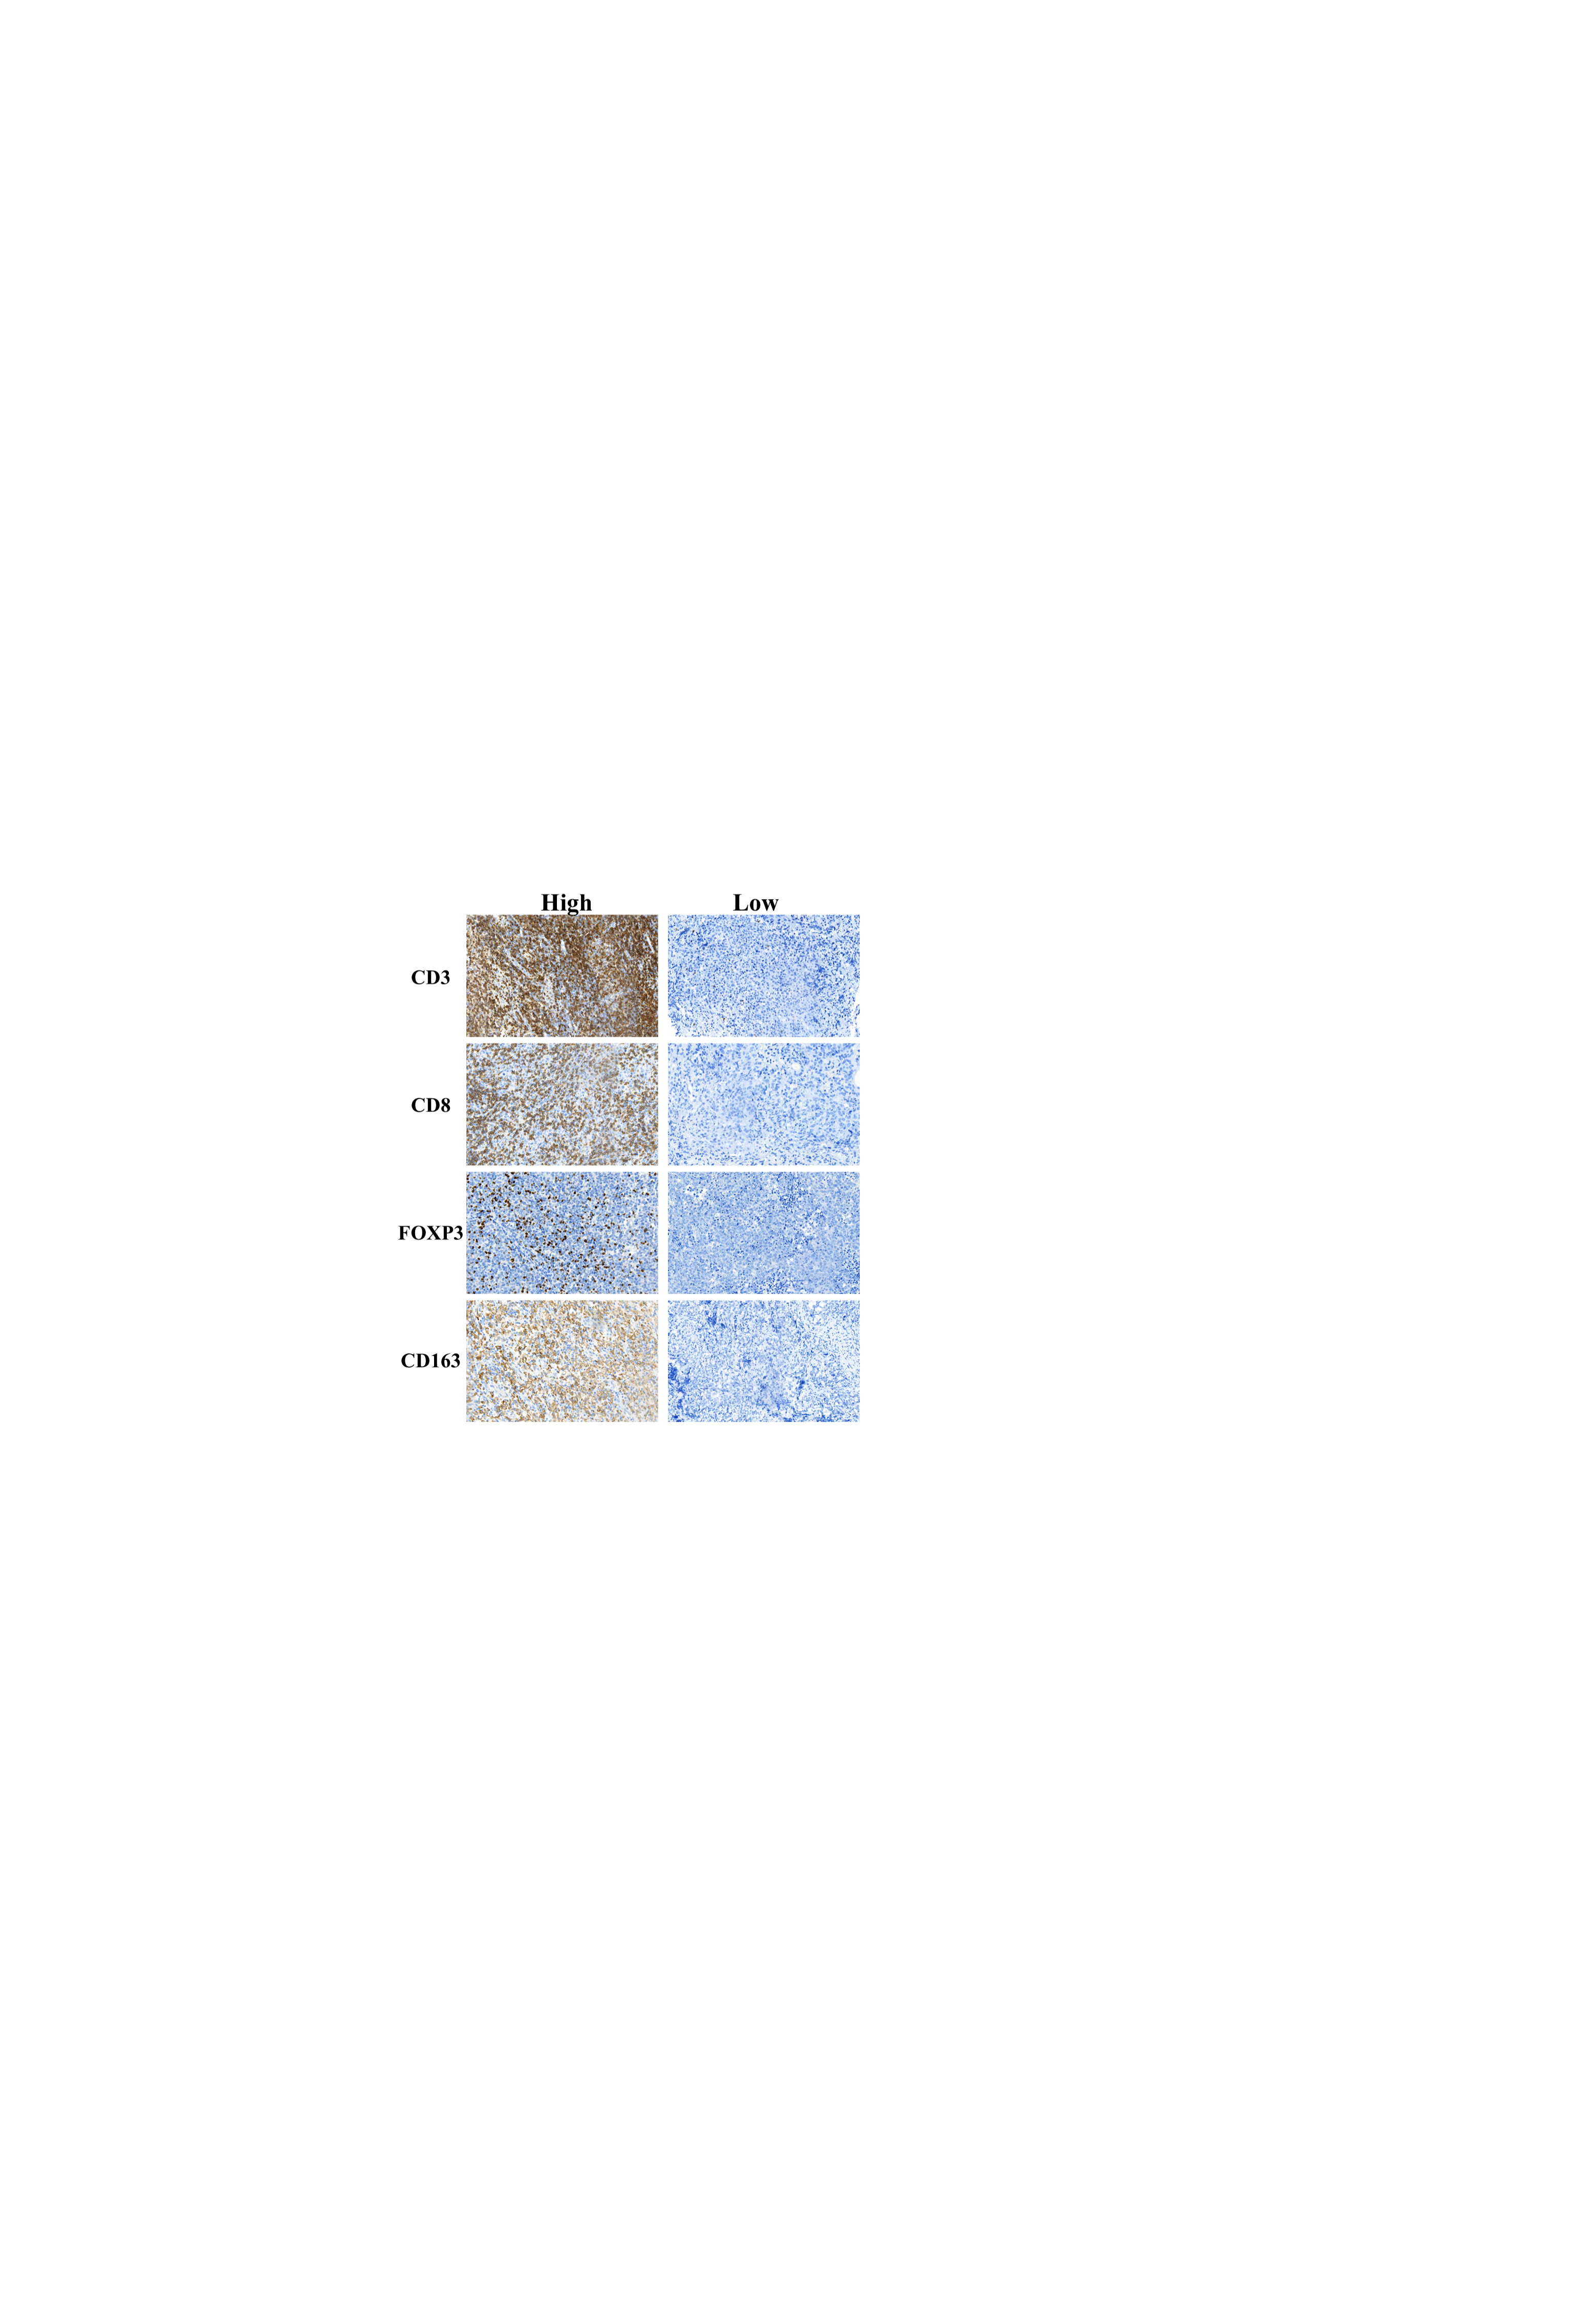 |
| --- |

**Figure S2.** Neoplastic and microenvironmental PD-L1 expression in diffuse large B-cell lymphoma: Tumor cells (nPD-L1) and microenvironmental cells (mPD-L1).

| 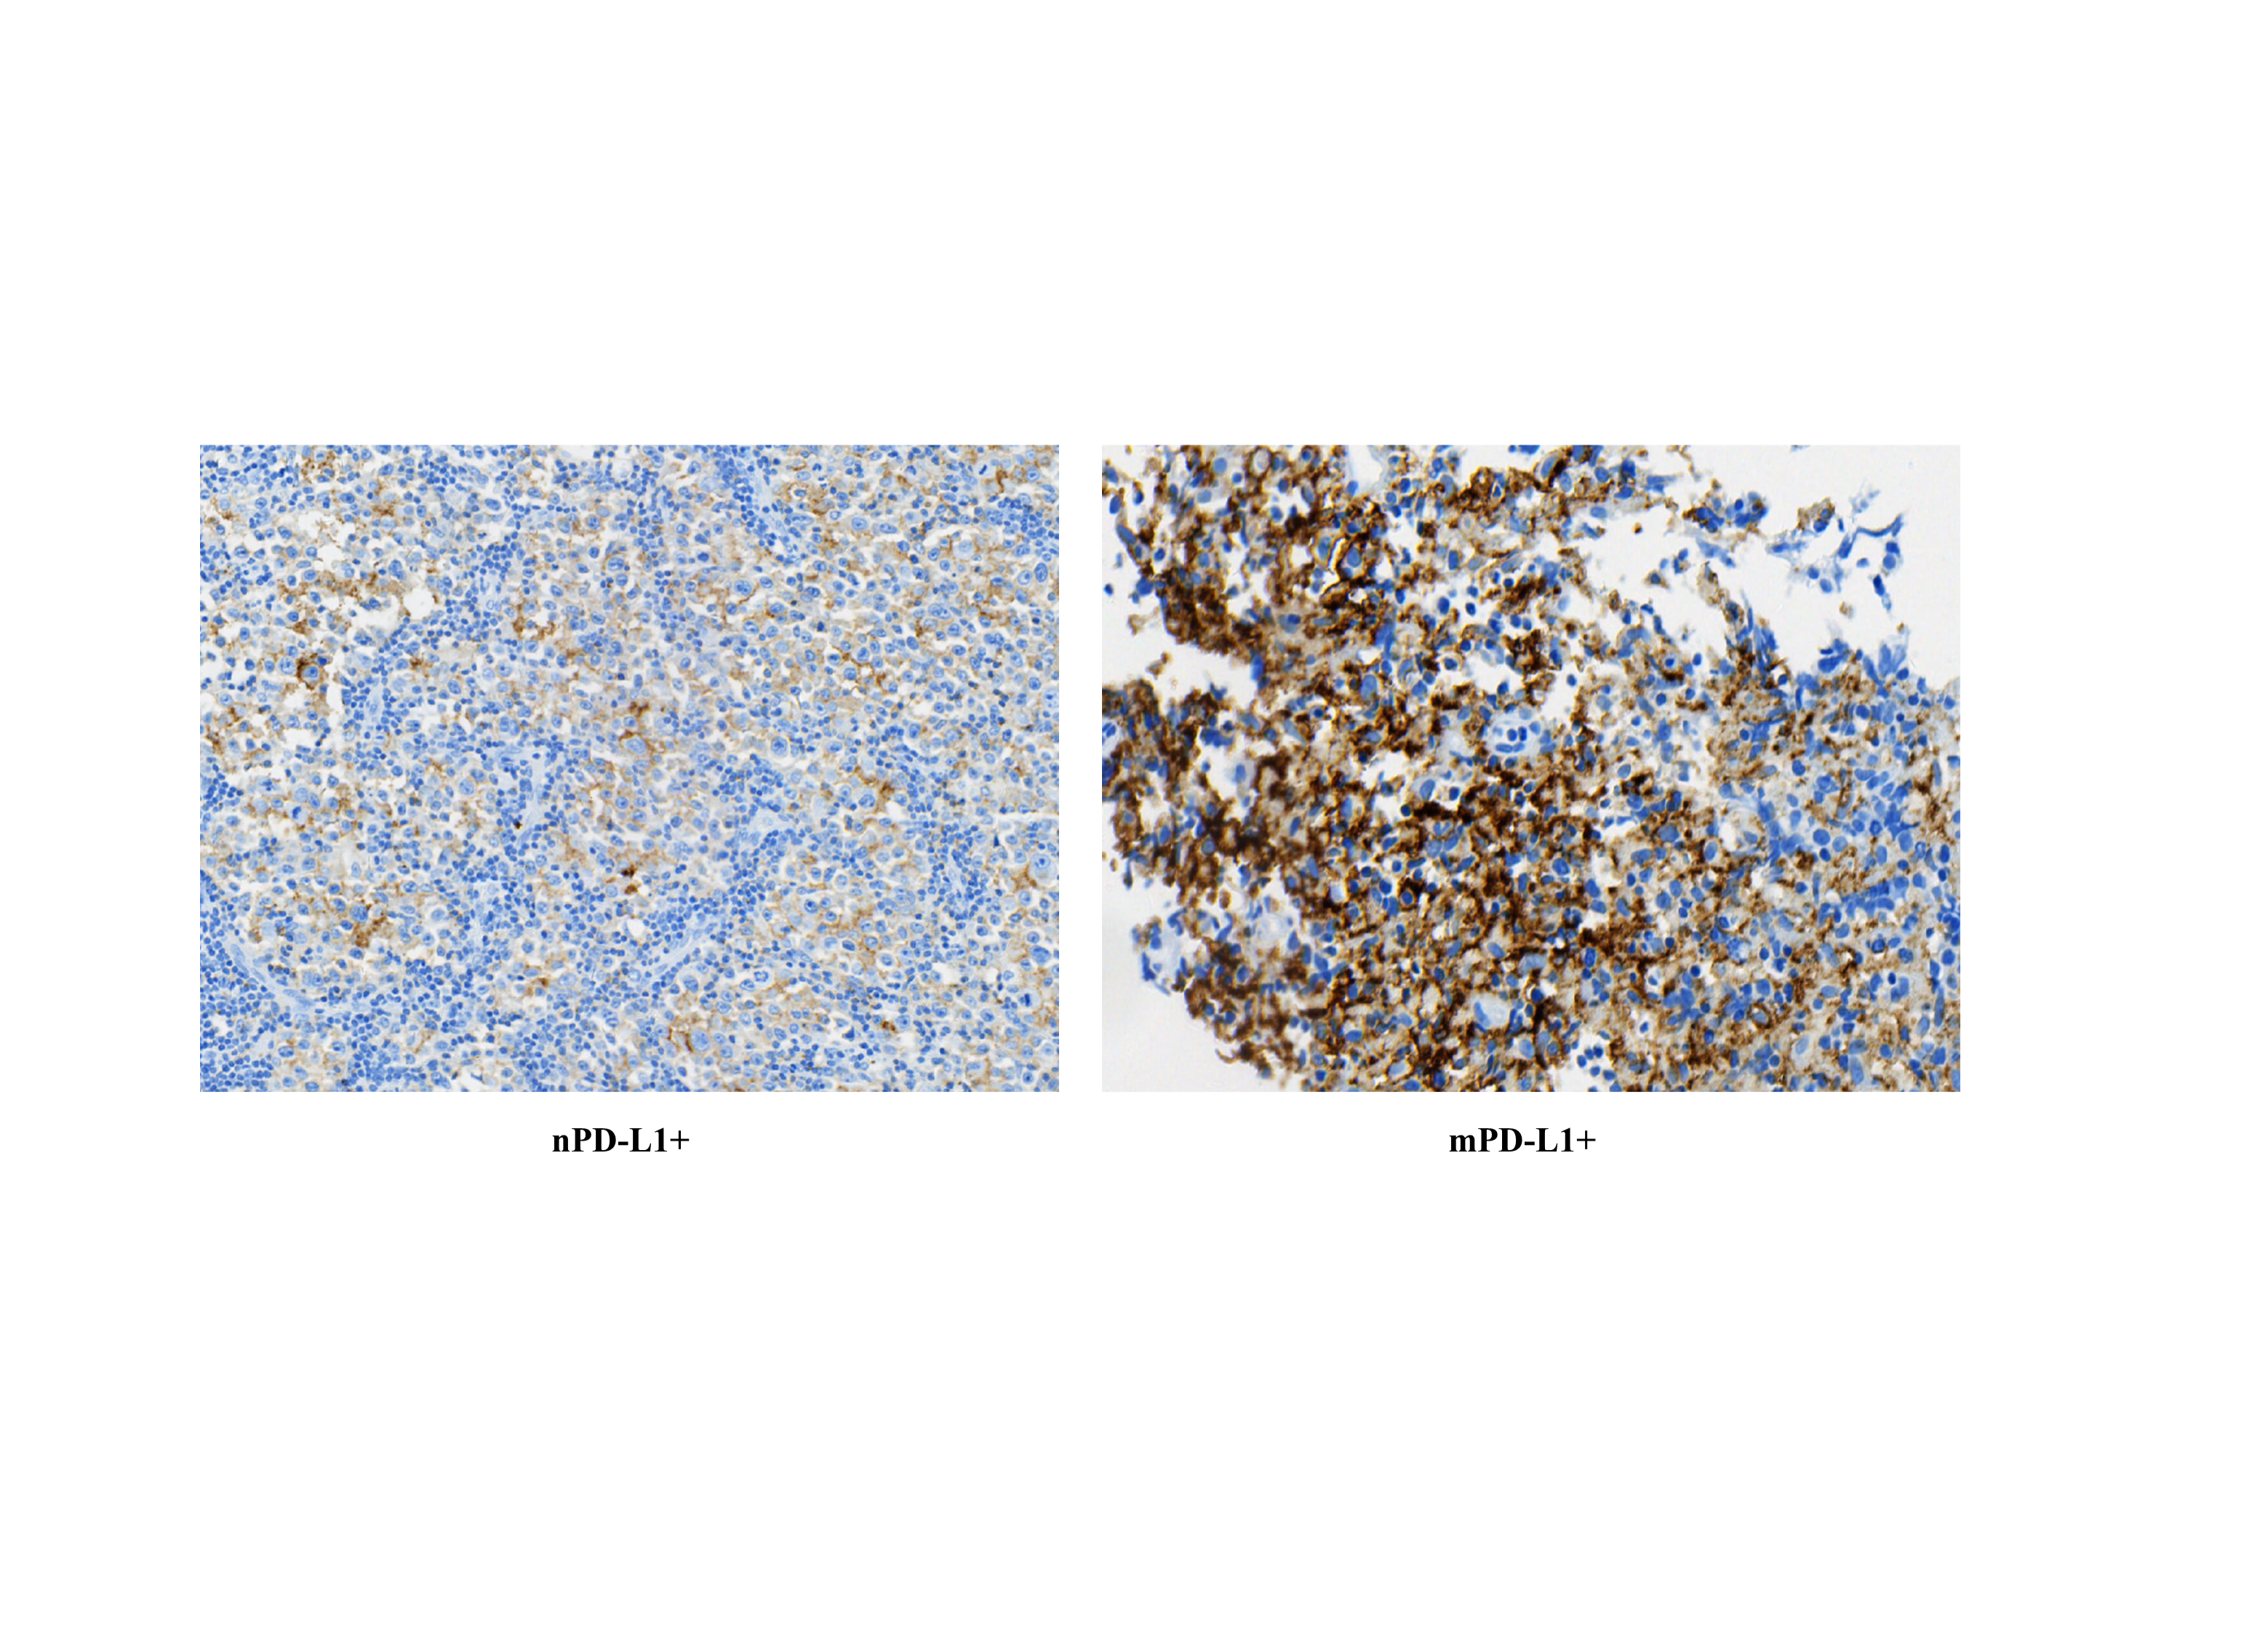 |
| --- |
